# Supplementary material for: Core-regenerated vapor–solid growth of hierarchical stem-like VOx nanocrystals on VO2@TiO2 core–shell nanorods: microstructure and mechanism
Source: Royal Society of Chemistry journal article supplement (doi:10.1039/c3ce40947c), 2013-01-01

## Core-regenerated vapor-solid growth of hierarchical VO<sub>x</sub>

### nanobranchlets on VO<sub>2</sub>@TiO<sub>2</sub> core/shell nanorods

Yamei Li<sup>1</sup>, Shidong Ji<sup>1</sup>, Yanfeng Gao<sup>1,3</sup>, Hongjie Luo<sup>1,3</sup>, Ping Jin<sup>\*1,2</sup>, Shaotang Li<sup>1</sup>,  
Meng Jiang<sup>1</sup>, Yijie Zhou<sup>1</sup>, Rong Li<sup>1</sup>, Bingbing Wang<sup>1</sup>

1 State Key Laboratory of High Performance Ceramics and Superfine Microstructure, Shanghai Institute of Ceramics, Chinese Academy of Sciences, Dingxi 1295, Changning, Shanghai, 200050, China

2 National Institute of Advanced Industrial Science and Technology (AIST), Moriyma, Nagoya 463-8560, Japan

3 School of Materials Science and Engineering, Shanghai University, Shangda Rd. 99, Baoshan, Shanghai 200444, China

Email for correspondence: p-jin@mail.sic.ac.cn

### Supplementary information S1.

#### Elemental qualitative analysis by EDS

1) EDS spectra for sample shown in Fig.3-a and e:

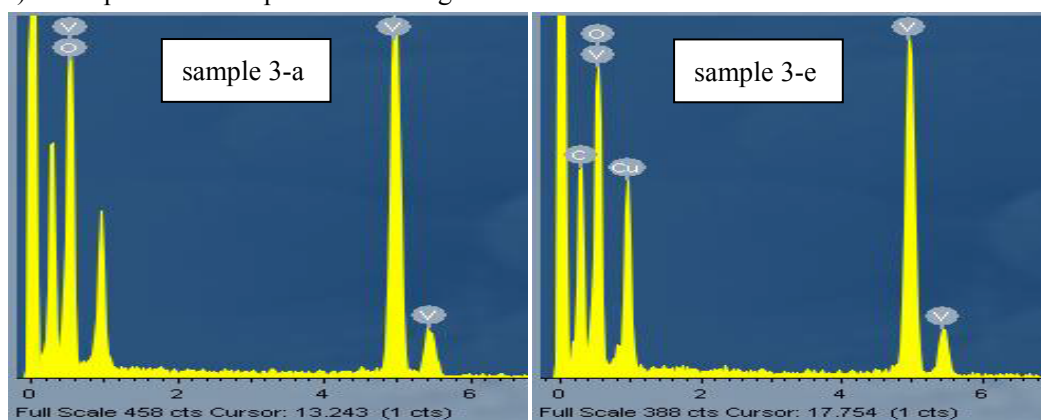

2) EDS spectra for sample shown in Fig.7-d and e:

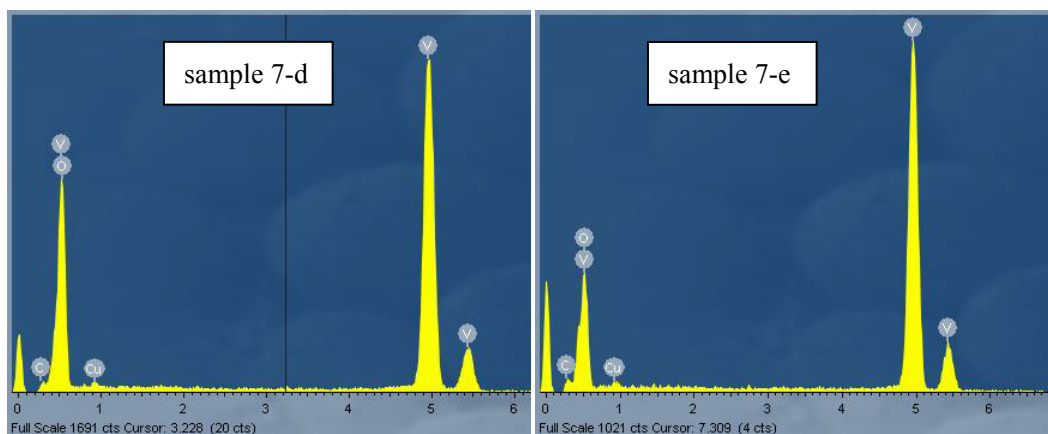

## Supplementary information S2.

a) XRD spectra after air annealing the VO<sub>2</sub> powders in air at 350 °C for 30 mins.

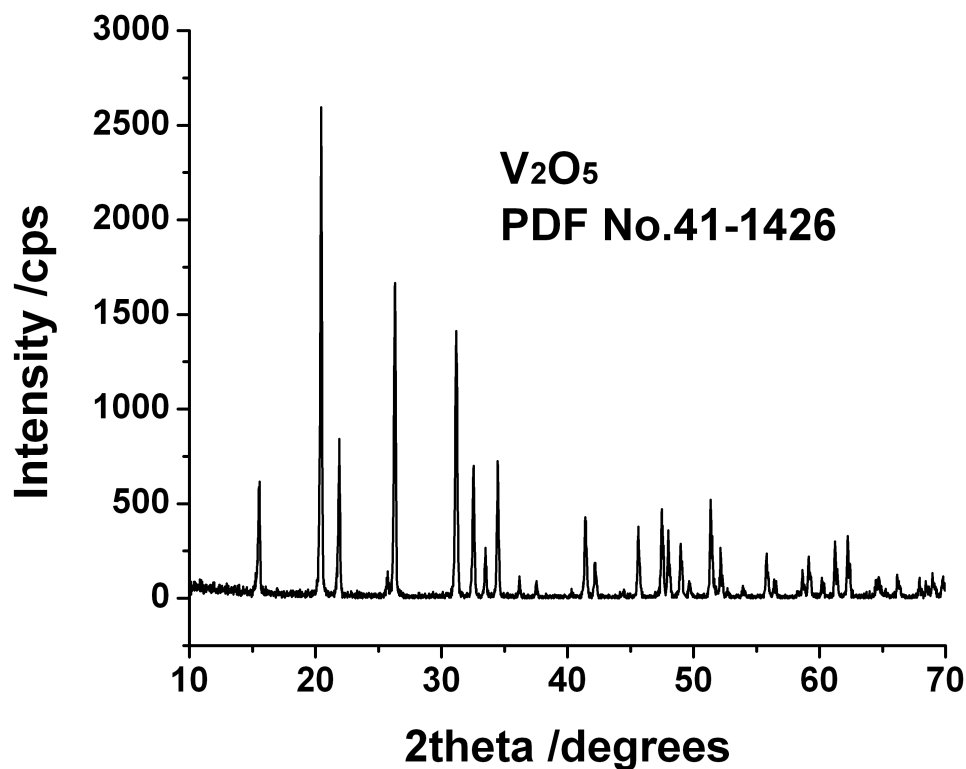

b) SEM images for V<sub>2</sub>O<sub>5</sub>@TiO<sub>2</sub> core/shell samples with shell thickness at 20nm (a) and 70nm (b) without addition of PVP. No stem-like nanostructures formed on the surface of the shell.

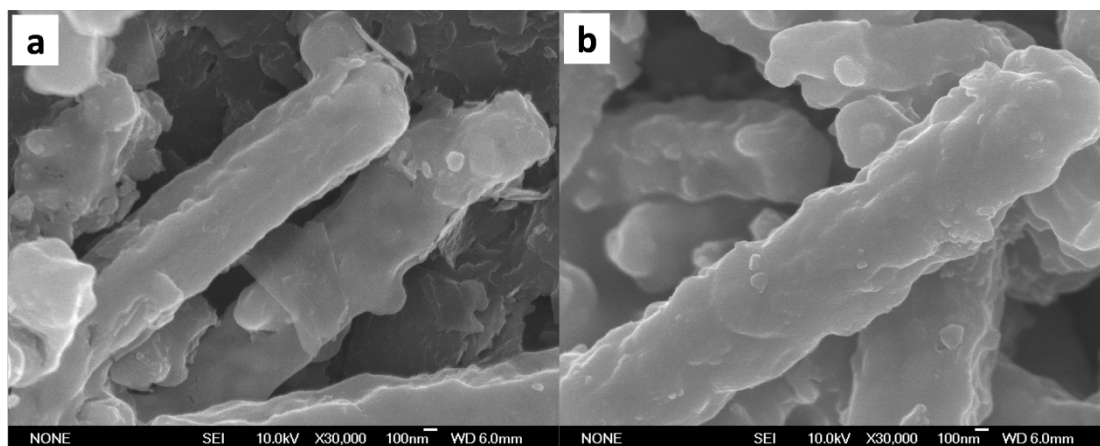

### Supplementary information S3.

The microstructure of TiO<sub>2</sub> shell.

a) and b) are the TEM images for TV-20 sample before and after annealing. R1) gives the TiO<sub>2</sub> grains and the grain boundary in a specific part of the shell. HRTEM fringes can be indexed to anatase {101} planar spaces.

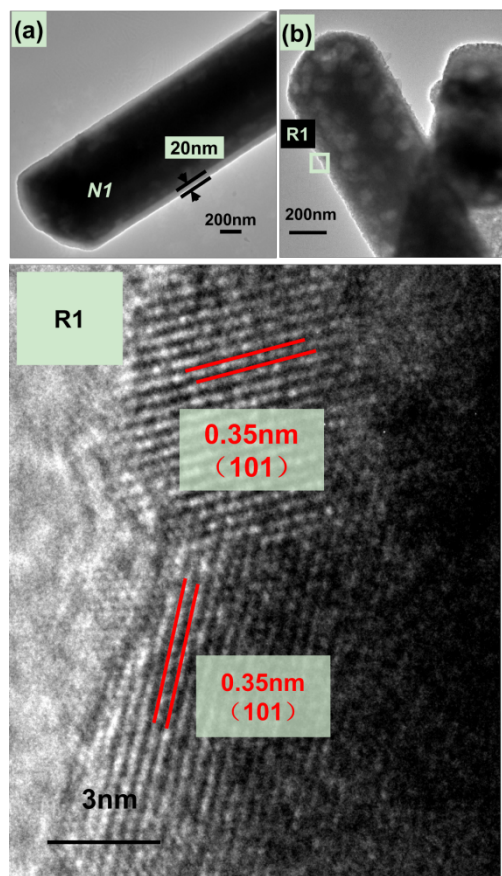

Supplement: c3ce40947c.pdf [file c3ce40947c.pdf]
